# Supplementary material for: Quality control-driven deep ensemble for accountable automated segmentation of cardiac magnetic resonance LGE and VNE images
Source: PubMed Central journal article supplement (PMC10518404; doi:10.3389/fcvm.2023.1213290), 2023-09-11
Supplement: Datasheet1.pdf [file Datasheet1.pdf]

## ***Supplementary Material***

### **1 HYPERTROPHIC CARDIOMYOPATHY REGISTRY (HCMR) INVESTIGATORS**

(In alphabetical order)

Theodore Abraham, Hypertrophic Cardiomyopathy Center of Excellence, Johns Hopkins University, Baltimore, United States of America;

Lisa Anderson, St George's University Hospitals NHS Trust, London, United Kingdom;

Florian Andre, Department of Medicine, Heidelberg University, Heidelberg, Germany;

Evan Appelbaum, Departments of Medicine, Cardiovascular Division & Radiology, Beth Israel Deaconess Medical Center, Harvard Medical School, Boston, United States of America;

Camillo Autore, Division of Cardiology, Department of Clinical & Molecular Medicine, St. Andrea Hospital, Sapienza University, Rome, Italy;

Colin Berry, British Heart Foundation Glasgow Cardiovascular Research Center, Institute of Cardiovascular & Medical Sciences, University of Glasgow, United Kingdom;

Elena Biagini, Cardio-Thoraco-Vascular Department, University Hospital of Bologna, Policlinico S. Orsola-Malpighi, Bologna, Italy;

William Bradlow, Department of Cardiology, New Queen Elizabeth Hospital Birmingham, United Kingdom;

Chiara Bucciarelli-Ducci, Bristol Heart Institute, Bristol National Institute of Health Research (NIHR) Biomedical Research Center, University Hospitals Bristol NHS Trust & University of Bristol, United Kingdom;

Amedeo Chiribiri, Cardiovascular Division, Kings College London British Heart Foundation Center of Excellence, The Rayne Institute, St. Thomas Hospital Campus, London, United Kingdom;

Lubna Choudhury, Division of Cardiology, Department of Medicine, Bluhm Cardiovascular Institute, Northwestern University Feinberg School of Medicine, Chicago, United States of America;

Andrew Crean, Division of Cardiology, Peter Munk Cardiac Center, University Health Network, University of Toronto, Ontario, Canada;

Dana Dawson, Aberdeen Cardiovascular & Diabetes Center, University of Aberdeen, United Kingdom;

Milind Y. Desai, Department of Cardiovascular Medicine, Center for Radiation Heart Disease, Heart & Vascular Institute, Cleveland Clinic, Cleveland, United States of America;

Patrice Desvigne-Nickens, National Heart, Lung, and Blood Institute, Bethesda, United States of America;

John DiMarco, University of Virginia Health System, Charlottesville, United States of America;

Eleanor Elstein, Division of Cardiology, Department of Medicine, Royal Victoria Hospital, McGill University Health Center, Montreal, Quebec, Canada;

Andrew Flett, Department of Cardiology, University Hospital Southampton NHS Foundation Trust, Southampton, United Kingdom;

Nancy Geller PhD, National Heart, Lung, and Blood Institute; Stephen Heitner, Oregon Health & Sciences University (OHSU), Division of Cardiovascular Medicine, Knight Cardiovascular Institute, Portland, United States of America;

Adam Helms, Department of Internal Medicine, University of Michigan, Ann Arbor, United States of America;

Carolyn Ho, Cardiovascular Division, Brigham and Womens Hospital, Boston, United States of America;

Daniel L. Jacoby, Section of Cardiovascular Medicine, Department of Internal Medicine, Yale School of Medicine, New Haven, United States of America;

Han Kim, Duke Cardiovascular Magnetic Resonance Center & Division of Cardiology, Duke University Medical Center, Durham, United States of America;

Bette Kim, Mount Sinai West, Icahn School of Medicine at Mount Sinai, New York City, United States of America;

Dong-Yun Kim PhD, National Heart, Lung, and Blood Institute; Eric Larose, Quebec Heart & Lung Institute, Laval University, Quebec, Canada;

Masliza Mahmud, Division of Cardiovascular Medicine, Radcliffe Department of Medicine, University of Oxford, United Kingdom; Heiko Mahrholdt, Department of Cardiology, Robert-Bosch-Krankenhaus, Stuttgart, Germany;

Martin Maron, Hypertrophic Cardiomyopathy Center & Research Institute, Tufts Medical Center, Boston, United States of America;

Gerry McCann, Department of Cardiovascular Sciences, University of Leicester, United Kingdom; Michelle Michaels, Erasmus University, Rotterdam, the Netherlands;

Saidi Mohiddin, Barts Heart Center, The Cardiovascular Magnetic Resonance Imaging Unit, St Bartholomew's Hospital, London, United Kingdom;

Sherif Nagueh, Methodist DeBakey Heart & Vascular Center, Houston, United States of America;

David Newby, Center for Cardiovascular Science, University of Edinburgh, United Kingdom;

Iacopo Olivotto, Cardiomyopathy Unit & Genetic Unit, Careggi University Hospital, Florence, Italy;

Anjali Owens, Center for Inherited Cardiovascular Disease, Division of Cardiovascular Medicine, Perelman School of Medicine, University of Pennsylvania, Philadelphia, United States of America;

F. Pierre-Mongeon, Montréal Heart Institute, Canada; Sanjay Prasad, National Heart & Lung Institute, Imperial College London & Royal Brompton Hospital, London, United Kingdom;

Ornella Rimoldi, Vita Salute University & San Raffaele Hospital, Milan, Italy;

Jeanette Schulz-Menger, Charité, Medical Faculty of the Humboldt University, Experimental & Clinical Research Center and Helios Clinics, Cardiology, Berlin, Germany;

Mark Sherrid, Hypertrophic Cardiomyopathy Program, Leon Charney Division of Cardiology, Department of Medicine, New York University School of Medicine, New York, United States of America;

---

Sven Plein, Department of Biomedical Imaging Science, Leeds Institute of Cardiovascular and Metabolic Medicine, University of Leeds, United Kingdom;

Albert van Rossum, Department of Cardiology, Amsterdam UMC, HZ Amsterdam, the Netherlands;

Jonathan Weinsaft, Departments of Medicine & Radiology, Weill Cornell Medical College, New York, United States of America;

James White, Calgary Foothills Medical Center, University of Calgary, Alberta, Canada;

Eric Williamson, Department of Radiology, Mayo Clinic, Rochester, United States of America.

## **2 OXFORD ACUTE MYOCARDIAL INFARCTION (OXAMI) STUDY INVESTIGATORS**

(In alphabetical order)

Adrian P. Banning, Acute Vascular Imaging Centre (AVIC), University of Oxford, Oxford University Hospitals NHS Trust, John Radcliffe Hospital, Oxford, United Kingdom;

Keith Channon, Acute Vascular Imaging Centre (AVIC), University of Oxford, Oxford University Hospitals NHS Trust, John Radcliffe Hospital, Oxford, United Kingdom;

Robin P. Choudhury, Acute Vascular Imaging Centre (AVIC), University of Oxford, Oxford University Hospitals NHS Trust, John Radcliffe Hospital, Oxford, United Kingdom;

Giovanni L. De Maria, Acute Vascular Imaging Centre (AVIC), University of Oxford, Oxford University Hospitals NHS Trust, John Radcliffe Hospital, Oxford, United Kingdom;

Raj Kharbanda, Oxford University Hospitals NHS Trust, John Radcliffe Hospital, Oxford, United Kingdom;

Jeremy Langrish, Oxford University Hospitals NHS Trust, John Radcliffe Hospital, Oxford, United Kingdom;

Andrew Lucking, Oxford University Hospitals NHS Trust, John Radcliffe Hospital, Oxford, United Kingdom.
